# Supplementary material for: Development and validation of the Ibadan Simplified Developmental Screening chart
Source: Frontiers journal article supplement (doi:10.3389/fped.2022.1055997), 2023-01-11
Supplement: Data_Sheet_1.pdf [file Data_Sheet_1.pdf]

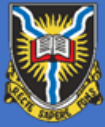

# IBADAN SIMPLIFIED DEVELOPMENTAL SCREENING (ISDS) CHART

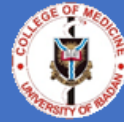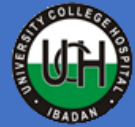

NAME \_\_\_\_\_  
DATE OF EVALUATION \_\_\_\_\_ DATE OF BIRTH \_\_\_\_\_ AGE \_\_\_\_\_  
GESTATIONAL AGE AT DELIVERY \_\_\_\_\_ (WEEKS) PRETERM/TERM DELIVERY \_\_\_\_\_  
ANY PARENTAL CONCERNS \_\_\_\_\_  
LIST: \_\_\_\_\_  
NAME OF ATTENDING PHYSICIAN \_\_\_\_\_  
NAME OF CONSULTANT \_\_\_\_\_

## 6 WEEKS

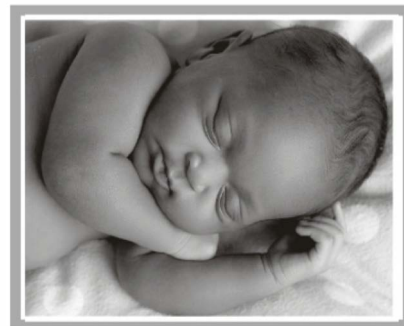

|                                                                                                               | Yes                      | Somewhat                 | No                       |
|---------------------------------------------------------------------------------------------------------------|--------------------------|--------------------------|--------------------------|
| <b>Vision and Fine motor</b>                                                                                  |                          |                          |                          |
| • Can baby get his fist to his mouth?                                                                         | <input type="checkbox"/> | <input type="checkbox"/> | <input type="checkbox"/> |
| • Does baby move both hands freely?                                                                           | <input type="checkbox"/> | <input type="checkbox"/> | <input type="checkbox"/> |
| • Does baby focus and follow on your face?                                                                    | <input type="checkbox"/> | <input type="checkbox"/> | <input type="checkbox"/> |
| • Does baby turn head and eyes to a light source?                                                             | <input type="checkbox"/> | <input type="checkbox"/> | <input type="checkbox"/> |
| <i>Vision and Fine Motor Total</i>                                                                            |                          |                          | <input type="checkbox"/> |
| <b>Hearing, speech and language</b>                                                                           |                          |                          |                          |
| • Does baby react to loud sound with a startle?                                                               | <input type="checkbox"/> | <input type="checkbox"/> | <input type="checkbox"/> |
| • Does baby pay attention to speaker's mouth or eyes?                                                         | <input type="checkbox"/> | <input type="checkbox"/> | <input type="checkbox"/> |
| • Does baby coo smile in response to face or voice?                                                           | <input type="checkbox"/> | <input type="checkbox"/> | <input type="checkbox"/> |
| <i>Hearing, speech and language Total</i>                                                                     |                          |                          | <input type="checkbox"/> |
| <b>Social, emotional and behavioural</b>                                                                      |                          |                          |                          |
| • Does baby look at you in the eye for a few seconds?                                                         | <input type="checkbox"/> | <input type="checkbox"/> | <input type="checkbox"/> |
| • Does baby suck well?                                                                                        | <input type="checkbox"/> | <input type="checkbox"/> | <input type="checkbox"/> |
| • Does baby smile responsively?                                                                               | <input type="checkbox"/> | <input type="checkbox"/> | <input type="checkbox"/> |
| <i>Social, emotional and behavioural Total</i>                                                                |                          |                          | <input type="checkbox"/> |
| <b>Gross motor</b>                                                                                            |                          |                          |                          |
| • When baby is pulled from lying to sitting, does he drop head to the back - so you need to support his head? | <input type="checkbox"/> | <input type="checkbox"/> | <input type="checkbox"/> |
| • Does baby lift his head up momentarily when lying tummy down?                                               | <input type="checkbox"/> | <input type="checkbox"/> | <input type="checkbox"/> |
| • When baby is held in standing position, does he lift one foot after another in stepping pattern?            | <input type="checkbox"/> | <input type="checkbox"/> | <input type="checkbox"/> |
| <i>Gross motor Total</i>                                                                                      |                          |                          | <input type="checkbox"/> |



# IBADAN SIMPLIFIED DEVELOPMENTAL SCREENING (ISDS) CHART



NAME \_\_\_\_\_

DATE OF EVALUATION \_\_\_\_\_ DATE OF BIRTH \_\_\_\_\_ AGE \_\_\_\_\_

GESTATIONAL AGE AT DELIVERY \_\_\_\_\_ (WEEKS) PRETERM/TERM DELIVERY \_\_\_\_\_

ANY PARENTAL CONCERNS \_\_\_\_\_

LIST: \_\_\_\_\_

NAME OF ATTENDING PHYSICIAN \_\_\_\_\_

NAME OF CONSULTANT \_\_\_\_\_

## 10 WEEKS

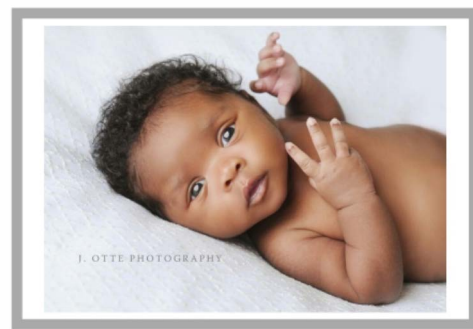

### Vision and Fine Motor

|                                                                             | Yes                      | Somewhat                 | No                       |
|-----------------------------------------------------------------------------|--------------------------|--------------------------|--------------------------|
| • Does baby keep hands opened and relaxed most of the time?                 | <input type="checkbox"/> | <input type="checkbox"/> | <input type="checkbox"/> |
| • When hand or object is moved close to his eyes, does he blink in defence? | <input type="checkbox"/> | <input type="checkbox"/> | <input type="checkbox"/> |
| • Does child follow faces by moving eyes from side to side?                 | <input type="checkbox"/> | <input type="checkbox"/> | <input type="checkbox"/> |
| <i>Vision and Fine motor Total</i>                                          |                          |                          | <input type="checkbox"/> |

### Hearing, speech and language

|                                                               |                          |                          |                          |
|---------------------------------------------------------------|--------------------------|--------------------------|--------------------------|
| • Does baby move, usually the upper limbs, to familiar voice? | <input type="checkbox"/> | <input type="checkbox"/> | <input type="checkbox"/> |
| • Has baby started making single vowel sounds "ah""eh""uh"?   | <input type="checkbox"/> | <input type="checkbox"/> | <input type="checkbox"/> |
| • Does baby listen to voice and coos?                         | <input type="checkbox"/> | <input type="checkbox"/> | <input type="checkbox"/> |
| • Does baby make sounds to caregiver's smile and voice?       | <input type="checkbox"/> | <input type="checkbox"/> | <input type="checkbox"/> |
| <i>Hearing, speech and language total</i>                     |                          |                          | <input type="checkbox"/> |

### Social, emotional and behavioural

|                                                         |                          |                          |                          |
|---------------------------------------------------------|--------------------------|--------------------------|--------------------------|
| • Does baby make cooing sounds? (soft, murmuring sound) | <input type="checkbox"/> | <input type="checkbox"/> | <input type="checkbox"/> |
| • Does baby show excitement by waving arms and legs?    | <input type="checkbox"/> | <input type="checkbox"/> | <input type="checkbox"/> |
| • Does baby give warm smiles and laughs?                | <input type="checkbox"/> | <input type="checkbox"/> | <input type="checkbox"/> |
| <i>Social, emotional and behavioural</i>                |                          |                          | <input type="checkbox"/> |

### Gross motor

|                                                                       |                          |                          |                          |
|-----------------------------------------------------------------------|--------------------------|--------------------------|--------------------------|
| • When child is laid on his tummy, does he raise head from the floor? | <input type="checkbox"/> | <input type="checkbox"/> | <input type="checkbox"/> |
| • Does the head lag when pulled to the sitting position?              | <input type="checkbox"/> | <input type="checkbox"/> | <input type="checkbox"/> |
| <i>Gross motor total</i>                                              |                          |                          | <input type="checkbox"/> |

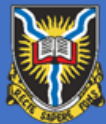

# IBADAN SIMPLIFIED DEVELOPMENTAL SCREENING (ISDS) CHART

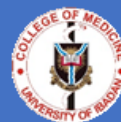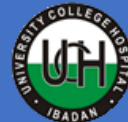

NAME \_\_\_\_\_

DATE OF EVALUATION \_\_\_\_\_ DATE OF BIRTH \_\_\_\_\_ AGE \_\_\_\_\_

GESTATIONAL AGE AT DELIVERY \_\_\_\_\_ (WEEKS) PRETERM/TERM DELIVERY \_\_\_\_\_

ANY PARENTAL CONCERNS \_\_\_\_\_

LIST: \_\_\_\_\_

NAME OF ATTENDING PHYSICIAN \_\_\_\_\_

NAME OF CONSULTANT \_\_\_\_\_

## 14 WEEKS

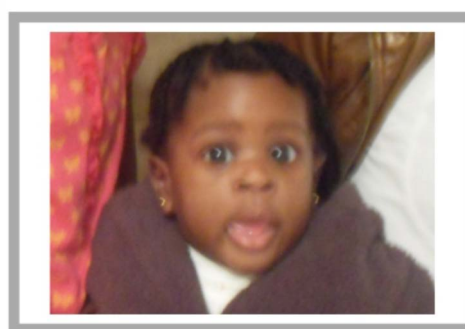

### Vision and Fine Motor

- Does child reach out for toys?
- Can child hold toys at least briefly?
- Move her arms together and apart?

Yes      Somewhat      No

|                          |                          |                          |
|--------------------------|--------------------------|--------------------------|
| <input type="checkbox"/> | <input type="checkbox"/> | <input type="checkbox"/> |
| <input type="checkbox"/> | <input type="checkbox"/> | <input type="checkbox"/> |
| <input type="checkbox"/> | <input type="checkbox"/> | <input type="checkbox"/> |

Vision and Fine Motor total ☐

### Hearing, speech and language

- Does child turn head to search for sounds/listen to voice?
- Does child recognise caregiver's voice?
- Does child vocalize "ma" or "da"?

|                          |                          |                          |
|--------------------------|--------------------------|--------------------------|
| <input type="checkbox"/> | <input type="checkbox"/> | <input type="checkbox"/> |
| <input type="checkbox"/> | <input type="checkbox"/> | <input type="checkbox"/> |
| <input type="checkbox"/> | <input type="checkbox"/> | <input type="checkbox"/> |

Hearing, speech and language total ☐

### Social, emotional and behavioural

- Does child smile both spontaneously and back at people?
- Does child cry when upset and seek comfort?
- Does child smile at herself in the mirror?

|                          |                          |                          |
|--------------------------|--------------------------|--------------------------|
| <input type="checkbox"/> | <input type="checkbox"/> | <input type="checkbox"/> |
| <input type="checkbox"/> | <input type="checkbox"/> | <input type="checkbox"/> |
| <input type="checkbox"/> | <input type="checkbox"/> | <input type="checkbox"/> |

Social, emotional and behavioural total ☐

### Gross motor

- When lying on his back, can child roll from back to side?
- Does child hold head steady when held in sitting position?
- When held in sitting position, can child reach for toys around him/her?

|                          |                          |                          |
|--------------------------|--------------------------|--------------------------|
| <input type="checkbox"/> | <input type="checkbox"/> | <input type="checkbox"/> |
| <input type="checkbox"/> | <input type="checkbox"/> | <input type="checkbox"/> |
| <input type="checkbox"/> | <input type="checkbox"/> | <input type="checkbox"/> |

Gross motor total ☐



# IBADAN SIMPLIFIED DEVELOPMENTAL SCREENING (ISDS) CHART



NAME \_\_\_\_\_

DATE OF EVALUATION \_\_\_\_\_ DATE OF BIRTH \_\_\_\_\_ AGE \_\_\_\_\_

GESTATIONAL AGE AT DELIVERY \_\_\_\_\_ (WEEKS) PRETERM/TERM DELIVERY \_\_\_\_\_

ANY PARENTAL CONCERNS \_\_\_\_\_

LIST: \_\_\_\_\_

NAME OF ATTENDING PHYSICIAN \_\_\_\_\_

NAME OF CONSULTANT \_\_\_\_\_

## 6 MONTHS

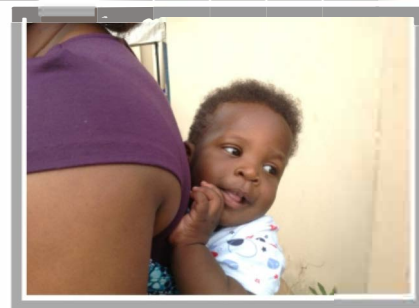

Yes      Somewhat      No

### Fine motor and Vision

- Does baby follow objects with his eyes in different directions? ☐ Yes ☐ Somewhat ☐ No
- Does baby reach out for objects? ☐ Yes ☐ Somewhat ☐ No
- Can baby pass objects from one hand to the other hand? ☐ Yes ☐ Somewhat ☐ No
- When lying on the back, can baby touch knees and feet with hands? ☐ Yes ☐ Somewhat ☐ No

*Fine motor and Vision total* ☐

### Hearing, Speech and Language

- Can baby manipulate a rattle? ☐ Yes ☐ Somewhat ☐ No
- Can baby differentiate between familiar and strange voices? ☐ Yes ☐ Somewhat ☐ No
- Does baby bang objects to elicit sound? ☐ Yes ☐ Somewhat ☐ No
- Does baby turn eyes/head to source of sound? ☐ Yes ☐ Somewhat ☐ No

*Hearing, speech and language total* ☐

### Social, emotional and behavioural

- Does baby babble? ☐ Yes ☐ Somewhat ☐ No
- Does baby respond to own name? ☐ Yes ☐ Somewhat ☐ No
- Does baby cry or show displeasure at the loss of a toy? ☐ Yes ☐ Somewhat ☐ No

*Social, emotional and behavioural total* ☐

### Gross motor

- When lying on his tummy, can baby raise head and upper part of the body? ☐ Yes ☐ Somewhat ☐ No
- When lying on his back, can he/she roll to the front? ☐ Yes ☐ Somewhat ☐ No
- Can baby sit with little or no support? ☐ Yes ☐ Somewhat ☐ No

*Gross motor total* ☐



# IBADAN SIMPLIFIED DEVELOPMENTAL SCREENING (ISDS) CHART



NAME \_\_\_\_\_

DATE OF EVALUATION \_\_\_\_\_ DATE OF BIRTH \_\_\_\_\_ AGE \_\_\_\_\_

GESTATIONAL AGE AT DELIVERY \_\_\_\_\_ (WEEKS) PRETERM/TERM DELIVERY \_\_\_\_\_

ANY PARENTAL CONCERNS \_\_\_\_\_

LIST: \_\_\_\_\_

NAME OF ATTENDING PHYSICIAN \_\_\_\_\_

NAME OF CONSULTANT \_\_\_\_\_

## 9 MONTHS

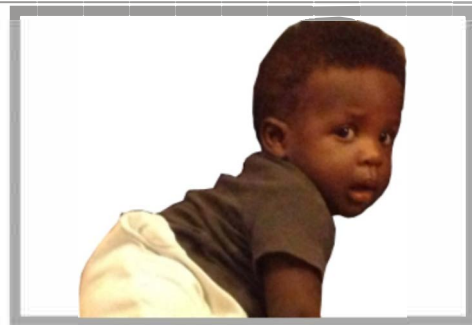

|                                                                                                                    | Yes                      | Somewhat                 | No                       |
|--------------------------------------------------------------------------------------------------------------------|--------------------------|--------------------------|--------------------------|
| <b>Fine motor and Vision</b>                                                                                       |                          |                          |                          |
| • Can baby pick up toys with only one hand?                                                                        | <input type="checkbox"/> | <input type="checkbox"/> | <input type="checkbox"/> |
| • Does baby reach out, grab, and put objects in his mouth?                                                         | <input type="checkbox"/> | <input type="checkbox"/> | <input type="checkbox"/> |
| • Can baby put objects into containers (with large openings) and take them out again                               | <input type="checkbox"/> | <input type="checkbox"/> | <input type="checkbox"/> |
| <i>Fine motor and vision total</i>                                                                                 |                          |                          | <input type="checkbox"/> |
| <b>Hearing, Speech and Language</b>                                                                                |                          |                          |                          |
| • Does baby turn eye/head/body to source of sound?                                                                 | <input type="checkbox"/> | <input type="checkbox"/> | <input type="checkbox"/> |
| • Does baby respond to name?                                                                                       | <input type="checkbox"/> | <input type="checkbox"/> | <input type="checkbox"/> |
| • Does baby attempt to sing along with a familiar song/babble?                                                     | <input type="checkbox"/> | <input type="checkbox"/> | <input type="checkbox"/> |
| <i>Hearing, speech and language total</i>                                                                          |                          |                          | <input type="checkbox"/> |
| <b>Social, emotional and behavioural</b>                                                                           |                          |                          |                          |
| • Does baby cry when strangers approach?                                                                           | <input type="checkbox"/> | <input type="checkbox"/> | <input type="checkbox"/> |
| • When baby is upset, does he show ways of comforting self like sucking thumb, holding on to a favourite toy, etc? | <input type="checkbox"/> | <input type="checkbox"/> | <input type="checkbox"/> |
| • Does baby show excitement at the sight of other babies?                                                          | <input type="checkbox"/> | <input type="checkbox"/> | <input type="checkbox"/> |
| <i>Social, emotional and behavioural total</i>                                                                     |                          |                          | <input type="checkbox"/> |
| <b>Gross motor</b>                                                                                                 |                          |                          |                          |
| • Does baby get into crawling position?                                                                            | <input type="checkbox"/> | <input type="checkbox"/> | <input type="checkbox"/> |
| • Does baby reach out for toys at a distance when in sitting position?                                             | <input type="checkbox"/> | <input type="checkbox"/> | <input type="checkbox"/> |
| • Is baby able to sit without support and without falling over?                                                    | <input type="checkbox"/> | <input type="checkbox"/> | <input type="checkbox"/> |
| <i>Gross motor total</i>                                                                                           |                          |                          | <input type="checkbox"/> |



# IBADAN SIMPLIFIED DEVELOPMENTAL SCREENING (ISDS) CHART



NAME \_\_\_\_\_

DATE OF EVALUATION \_\_\_\_\_ DATE OF BIRTH \_\_\_\_\_ AGE \_\_\_\_\_

GESTATIONAL AGE AT DELIVERY \_\_\_\_\_ (WEEKS) PRETERM/TERM DELIVERY \_\_\_\_\_

ANY PARENTAL CONCERNS \_\_\_\_\_

LIST: \_\_\_\_\_

NAME OF ATTENDING PHYSICIAN \_\_\_\_\_

NAME OF CONSULTANT \_\_\_\_\_

## 12 MONTHS

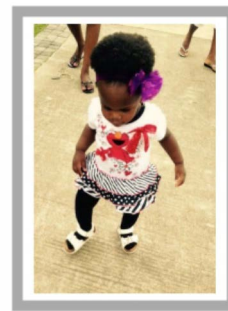

Yes      Somewhat      No

### Fine motor and Vision

- Can baby pick medium-sized bead/button with the thumb and another finger?
- Can baby give toy to caregiver when asked?
- Can baby hold/attempt to hold his own bottle/cup?
- Is baby able to build a block of 2 cubes?

|                          |                          |                          |
|--------------------------|--------------------------|--------------------------|
| <input type="checkbox"/> | <input type="checkbox"/> | <input type="checkbox"/> |
| <input type="checkbox"/> | <input type="checkbox"/> | <input type="checkbox"/> |
| <input type="checkbox"/> | <input type="checkbox"/> | <input type="checkbox"/> |
| <input type="checkbox"/> | <input type="checkbox"/> | <input type="checkbox"/> |

Fine motor and vision total ☐

### Hearing, Speech and Language

- Does baby say "mama" and "dada"?
- Does baby try to imitate words?
- Can baby identify two body parts on self?

|                          |                          |                          |
|--------------------------|--------------------------|--------------------------|
| <input type="checkbox"/> | <input type="checkbox"/> | <input type="checkbox"/> |
| <input type="checkbox"/> | <input type="checkbox"/> | <input type="checkbox"/> |
| <input type="checkbox"/> | <input type="checkbox"/> | <input type="checkbox"/> |

Hearing, speech and language total ☐

### Social, emotional and behavioural

- Can baby wave bye bye?
- Does baby use simple gesture like shaking head to mean "no"?
- Does baby cry when caregiver leaves?

|                          |                          |                          |
|--------------------------|--------------------------|--------------------------|
| <input type="checkbox"/> | <input type="checkbox"/> | <input type="checkbox"/> |
| <input type="checkbox"/> | <input type="checkbox"/> | <input type="checkbox"/> |
| <input type="checkbox"/> | <input type="checkbox"/> | <input type="checkbox"/> |

Social, emotional and behavioural total ☐

### Gross motor

- Can baby cruise around furniture?
- Can baby lower self to pick toys while holding on to furniture?
- Can baby pull himself to a standing position while sitting?

|                          |                          |                          |
|--------------------------|--------------------------|--------------------------|
| <input type="checkbox"/> | <input type="checkbox"/> | <input type="checkbox"/> |
| <input type="checkbox"/> | <input type="checkbox"/> | <input type="checkbox"/> |
| <input type="checkbox"/> | <input type="checkbox"/> | <input type="checkbox"/> |

Gross motor total ☐
