# Supplementary material for: Development and validation of the Ibadan Simplified Developmental Screening chart
Source: Frontiers journal article supplement (doi:10.3389/fped.2022.1055997), 2023-01-11
Supplement: Data_Sheet_2.pdf [file Data_Sheet_2.pdf]

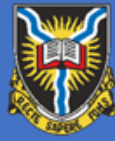

## IBADAN SIMPLIFIED DEVELOPMENTAL SCREENING (ISDS) CHART SCORING GUIDE

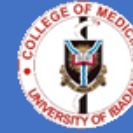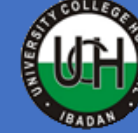

### AGE – 6 WEEKS

1. EVALUATE EVERY SINGLE ACTIVITY
2. ALLOCATE THE SCORE FOR EACH ACTIVITY IN EACH DOMAIN OF DEVELOPMENT
3. YES = 5, SOMEWHAT = 2, NO = 0
4. ADD UP THE SCORES FOR ALL THE ACTIVITIES IN EACH DOMAIN TO ARRIVE AT THE TOTAL DOMAIN SCORE
5. PUT SCORE IN THE CORRESPONDING BOX TO DETERMINE PERFORMANCE
6. IF CHILD'S SCORE FALLS IN THE RED BOX, REFER FOR FURTHER EVALUATION
7. IF CHILD'S SCORE FALLS IN THE PLAIN BOX, CHILD IS DOING WELL AND DOES NOT REQUIRE FURTHER EVALUATION AT THE TIME

| Domain of Development       | 0 | 1 | 2 | 3 | 4 | 5 | 6 | 7 | 8 | 9 | 10 | 11 | 12 | 13 | 14 | 15 | 16 | 17 | 18 | 19 | 20 | 21 | 22 | 23 | 24 | 25 |
|-----------------------------|---|---|---|---|---|---|---|---|---|---|----|----|----|----|----|----|----|----|----|----|----|----|----|----|----|----|
| Vision & Fine motor         |   |   |   |   |   |   |   |   |   |   |    |    |    |    |    |    |    |    |    |    |    |    |    |    |    |    |
| Hearing speech and Language |   |   |   |   |   |   |   |   |   |   |    |    |    |    |    |    |    |    |    |    |    |    |    |    |    |    |
| Social, emotional           |   |   |   |   |   |   |   |   |   |   |    |    |    |    |    |    |    |    |    |    |    |    |    |    |    |    |
| Gross motor                 |   |   |   |   |   |   |   |   |   |   |    |    |    |    |    |    |    |    |    |    |    |    |    |    |    |    |



## IBADAN SIMPLIFIED DEVELOPMENTAL SCREENING (ISDS) CHART SCORING GUIDE

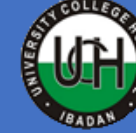

### AGE – 10 WEEKS

1. EVALUATE EVERY SINGLE ACTIVITY
2. ALLOCATE THE SCORE FOR EACH ACTIVITY IN EACH DOMAIN OF DEVELOPMENT
3. YES =5, SOMEWHAT = 2, NO = 0
4. ADD UP THE SCORES FOR ALL THE ACTIVITIES IN EACH DOMAIN TO ARRIVE AT THE TOTAL DOMAIN SCORE
5. PUT SCORE IN THE CORRESPONDING BOX TO DETERMINE PERFORMANCE
6. IF CHILD'S SCORE FALLS IN THE RED BOX, REFER FOR FURTHER EVALUATION
7. IF CHILD'S SCORE FALLS IN THE PLAIN BOX, CHILD IS DOING WELL AND DOES NOT REQUIRE FURTHER EVALUATION AT THE TIME

| Domain of Development          | 0 | 1 | 2 | 3 | 4 | 5 | 6 | 7 | 8 | 9 | 10 | 11 | 12 | 13 | 14 | 15 | 16 | 17 | 18 | 19 | 20 | 21 | 22 | 23 | 24 | 25 |
|--------------------------------|---|---|---|---|---|---|---|---|---|---|----|----|----|----|----|----|----|----|----|----|----|----|----|----|----|----|
| Vision & Fine motor            |   |   |   |   |   |   |   |   |   |   |    |    |    |    |    |    |    |    |    |    |    |    |    |    |    |    |
| Hearing speech and Language    |   |   |   |   |   |   |   |   |   |   |    |    |    |    |    |    |    |    |    |    |    |    |    |    |    |    |
| Social, emotional, behavioural |   |   |   |   |   |   |   |   |   |   |    |    |    |    |    |    |    |    |    |    |    |    |    |    |    |    |
| Gross motor                    |   |   |   |   |   |   |   |   |   |   |    |    |    |    |    |    |    |    |    |    |    |    |    |    |    |    |



## IBADAN SIMPLIFIED DEVELOPMENTAL SCREENING (ISDS) CHART SCORING GUIDE



### AGE – 14 WEEKS

1. EVALUATE EVERY SINGLE ACTIVITY
2. ALLOCATE THE SCORE FOR EACH ACTIVITY IN EACH DOMAIN OF DEVELOPMENT
3. YES =5, SOMEWHAT = 2, NO = 0
4. ADD UP THE SCORES FOR ALL THE ACTIVITIES IN EACH DOMAIN TO ARRIVE AT THE TOTAL DOMAIN SCORE
5. PUT SCORE IN THE CORRESPONDING BOX TO DETERMINE PERFORMANCE
6. IF CHILD'S SCORE FALLS IN THE RED BOX, REFER FOR FURTHER EVALUATION
7. IF CHILD'S SCORE FALLS IN THE PLAIN BOX, CHILD IS DOING WELL AND DOES NOT REQUIRE FURTHER EVALUATION AT THE TIME

| Domain of Development          | 0 | 1 | 2 | 3 | 4 | 5 | 6 | 7 | 8 | 9 | 10 | 11 | 12 | 13 | 14 | 15 | 16 | 17 | 18 | 19 | 20 | 21 | 22 | 23 | 24 | 25 |
|--------------------------------|---|---|---|---|---|---|---|---|---|---|----|----|----|----|----|----|----|----|----|----|----|----|----|----|----|----|
| Vision & Fine motor            |   |   |   |   |   |   |   |   |   |   |    |    |    |    |    |    |    |    |    |    |    |    |    |    |    |    |
| Hearing speech and Language    |   |   |   |   |   |   |   |   |   |   |    |    |    |    |    |    |    |    |    |    |    |    |    |    |    |    |
| Social, emotional, behavioural |   |   |   |   |   |   |   |   |   |   |    |    |    |    |    |    |    |    |    |    |    |    |    |    |    |    |
| Gross motor                    |   |   |   |   |   |   |   |   |   |   |    |    |    |    |    |    |    |    |    |    |    |    |    |    |    |    |



## IBADAN SIMPLIFIED DEVELOPMENTAL SCREENING (ISDS) CHART SCORING GUIDE



### AGE – 6 MONTHS

1. EVALUATE EVERY SINGLE ACTIVITY
2. ALLOCATE THE SCORE FOR EACH ACTIVITY IN EACH DOMAIN OF DEVELOPMENT
3. YES =5, SOMEWHAT = 2, NO = 0
4. ADD UP THE SCORES FOR ALL THE ACTIVITIES IN EACH DOMAIN TO ARRIVE AT THE TOTAL DOMAIN SCORE
5. PUT SCORE IN THE CORRESPONDING BOX TO DETERMINE PERFORMANCE
6. IF CHILD'S SCORE FALLS IN THE RED BOX, REFER FOR FURTHER EVALUATION
7. IF CHILD'S SCORE FALLS IN THE PLAIN BOX, CHILD IS DOING WELL AND DOES NOT REQUIRE FURTHER EVALUATION AT THE TIME

| Domain of Development          | 0 | 1 | 2 | 3 | 4 | 5 | 6 | 7 | 8 | 9 | 10 | 11 | 12 | 13 | 14 | 15 | 16 | 17 | 18 | 19 | 20 | 21 | 22 | 23 | 24 | 25 |
|--------------------------------|---|---|---|---|---|---|---|---|---|---|----|----|----|----|----|----|----|----|----|----|----|----|----|----|----|----|
| Vision & Fine motor            |   |   |   |   |   |   |   |   |   |   |    |    |    |    |    |    |    |    |    |    |    |    |    |    |    |    |
| Hearing speech and Language    |   |   |   |   |   |   |   |   |   |   |    |    |    |    |    |    |    |    |    |    |    |    |    |    |    |    |
| Social, emotional, behavioural |   |   |   |   |   |   |   |   |   |   |    |    |    |    |    |    |    |    |    |    |    |    |    |    |    |    |
| Gross motor                    |   |   |   |   |   |   |   |   |   |   |    |    |    |    |    |    |    |    |    |    |    |    |    |    |    |    |



## IBADAN SIMPLIFIED DEVELOPMENTAL SCREENING (ISDS) CHART SCORING GUIDE



### AGE – 9 MONTHS

1. EVALUATE EVERY SINGLE ACTIVITY
2. ALLOCATE THE SCORE FOR EACH ACTIVITY IN EACH DOMAIN OF DEVELOPMENT
3. YES =5, SOMEWHAT = 2, NO = 0
4. ADD UP THE SCORES FOR ALL THE ACTIVITIES IN EACH DOMAIN TO ARRIVE AT THE TOTAL DOMAIN SCORE
5. PUT SCORE IN THE CORRESPONDING BOX TO DETERMINE PERFORMANCE
6. IF CHILD'S SCORE FALLS IN THE RED BOX, REFER FOR FURTHER EVALUATION
7. IF CHILD'S SCORE FALLS IN THE PLAIN BOX, CHILD IS DOING WELL AND DOES NOT REQUIRE FURTHER EVALUATION AT THE TIME

| Domain of Development          | 0 | 1 | 2 | 3 | 4 | 5 | 6 | 7 | 8 | 9 | 10 | 11 | 12 | 13 | 14 | 15 | 16 | 17 | 18 | 19 | 20 | 21 | 22 | 23 | 24 | 25 |
|--------------------------------|---|---|---|---|---|---|---|---|---|---|----|----|----|----|----|----|----|----|----|----|----|----|----|----|----|----|
| Vision & Fine motor            |   |   |   |   |   |   |   |   |   |   |    |    |    |    |    |    |    |    |    |    |    |    |    |    |    |    |
| Hearing speech and Language    |   |   |   |   |   |   |   |   |   |   |    |    |    |    |    |    |    |    |    |    |    |    |    |    |    |    |
| Social, emotional, behavioural |   |   |   |   |   |   |   |   |   |   |    |    |    |    |    |    |    |    |    |    |    |    |    |    |    |    |
| Gross motor                    |   |   |   |   |   |   |   |   |   |   |    |    |    |    |    |    |    |    |    |    |    |    |    |    |    |    |



## IBADAN SIMPLIFIED DEVELOPMENTAL SCREENING (ISDS) CHART SCORING GUIDE



### AGE – 12 MONTHS

1. EVALUATE EVERY SINGLE ACTIVITY
2. ALLOCATE THE SCORE FOR EACH ACTIVITY IN EACH DOMAIN OF DEVELOPMENT
3. YES =5, SOMEWHAT = 2, NO = 0
4. ADD UP THE SCORES FOR ALL THE ACTIVITIES IN EACH DOMAIN TO ARRIVE AT THE TOTAL DOMAIN SCORE
5. PUT SCORE IN THE CORRESPONDING BOX TO DETERMINE PERFORMANCE
6. IF CHILD'S SCORE FALLS IN THE RED BOX, REFER FOR FURTHER EVALUATION
7. IF CHILD'S SCORE FALLS IN THE PLAIN BOX, CHILD IS DOING WELL AND DOES NOT REQUIRE FURTHER EVALUATION AT THE TIME

| Domain of Development          | 0 | 1 | 2 | 3 | 4 | 5 | 6 | 7 | 8 | 9 | 10 | 11 | 12 | 13 | 14 | 15 | 16 | 17 | 18 | 19 | 20 | 21 | 22 | 23 | 24 | 25 |
|--------------------------------|---|---|---|---|---|---|---|---|---|---|----|----|----|----|----|----|----|----|----|----|----|----|----|----|----|----|
| Vision & Fine motor            |   |   |   |   |   |   |   |   |   |   |    |    |    |    |    |    |    |    |    |    |    |    |    |    |    |    |
| Hearing speech and Language    |   |   |   |   |   |   |   |   |   |   |    |    |    |    |    |    |    |    |    |    |    |    |    |    |    |    |
| Social, emotional, behavioural |   |   |   |   |   |   |   |   |   |   |    |    |    |    |    |    |    |    |    |    |    |    |    |    |    |    |
| Gross motor                    |   |   |   |   |   |   |   |   |   |   |    |    |    |    |    |    |    |    |    |    |    |    |    |    |    |    |
